# Supplementary material
Source: publisher site journal article supplement (https://www.dovepress.com/article/528819)
Supplement: Supplementary file 1 [file 528819%20Supplementary%20Material.docx]

**Supplementary Material:** Interview guides for focus groups (FG 1-2, FG3, FG4)

*Interview guides were translated from French; these guides have not been validated for English use.*

# Figure S1: Focus group 1 and Focus group 2

**Introduction to the focus groups 1 and 2:**

Thank you for attending this first focus group. As a reminder, this focus group brings together outpatient **OR** inpatient healthcare professionals who are in contact with polypharmacy patients discharged following their hospitalisation. We also have a “patient partner” present, as it is important for us to have the point of view of all the people involved in the discharge process. Patients are seen as part of the interprofessional team. Therefore, when we talk about interprofessional collaboration during this focus group, we will also consider the collaboration between the patient and the healthcare professionals.

This first focus group aims to discuss current practices regarding interprofessional collaboration about medication when patients are discharged from the hospital. A second focus group will be held to discuss areas of improvement regarding interprofessional collaboration. You will be invited to participate in this second focus group, which will bring together healthcare professionals from outpatient and inpatient settings.

For this first focus group, we will ask you some open questions about your involvement in hospital-outpatient transitions regarding medication, as well as existing interprofessional collaboration around medication. We invite you to discuss each of these questions together, and to do so, each of you will be given time to speak. The rules for this focus group are to respect everyone's point of view and to speak clearly and audibly one person at a time. I would also remind you that this focus group will be audio-recorded and that this recording will then be transcribed and anonymized for data analysis. The focus group will last between 1 and 1h30.

Before starting the focus group, we'd like you to introduce yourself in a few words by giving your name, your profession, and how long you've been practicing.

| Subject | Theme | Questions | Follow-up questions | Answer |
| --- | --- | --- | --- | --- |
| The role of healthcare professionals during the hospital-outpatient transition in medication | Role regarding medication during the hospital-outpatient transition | - **How are you involved in medication management when a patient is discharged from the hospital?** | - When do you take part? - **What do you do to ensure continuity of care during the hospital-outpatient care transition?** | - Pharm1 - Pharm2 - Med1 - Med2 - Pat |
| Comments : | | |
| Patient safety at hospital discharge | - **How would you describe medication safety for patients leaving the hospital?** | - **What is the main medication-related risks you encounter when patients leave the hospital?** | - Pharm1 - Pharm2 - Med1 - Med2 - Pat |
| Comments : | | |
| Interprofessional collaboration during the hospital-ambulatory transition | Interactions with other healthcare professionals concerning medication | - **Which healthcare professionals do you work with regarding medication when a patient is discharged from the hospital, and to what extent?** | - **Does interprofessional collaboration differ depending on whether the healthcare professional you are working in an outpatient or inpatient setting and if so, what are the differences?** - **What tools do you often use for interprofessional collaboration on medication-related issues at hospital discharge?** | - Pharm1 - Pharm2 - Med1 - Med2 - Pat |
| Comments : | | |
| Satisfaction with interprofessional collaboration | - **Can you describe your satisfaction with how interprofessional collaboration on medication is carried out?** | - **What are the main factors influencing your satisfaction (positively or negatively)?** - Could you give us an example to illustrate your satisfaction? | - Pharm1 - Pharm2 - Med1 - Med2 - Pat |
| Comments : | | |
| Challenges to interprofessional collaboration | - **What are the challenges in terms of interprofessional collaboration?** - What difficulties do you encounter to ensure continuity of medication after hospital discharge? | - **Do you have any examples in your experience where interprofessional collaboration has played an important role in patient safety about medication after hospital discharge?** - **Could you give us an example of a situation where interprofessional collaboration has been particularly difficult?** | - Pharm1 - Pharm2 - Med1 - Med2 - Pat |
|  | Comments : | | |

10 minutes before the end: Were there any themes you would have liked to discuss during this focus group?

Following this focus group, if we have any questions for clarification on certain points raised, can we contact you, and by what means (e-mail, telephone)?

# Figure S2: Focus group 3

**Introductory text to the focus group:**

Thank you all for attending this focus group. As a reminder, this mixed focus group brings together healthcare professionals working in outpatient and inpatient settings who are in contact with polypharmacy patients discharged home following their hospitalisation. Once again, for this focus group, we had the participation of a “patient partner”, to have the point of view of all the people involved in the hospital discharge.

This focus group aims to explore ways of improving interprofessional collaboration around medication during care transition after a hospitalisation. To do this, we will ask you open-ended questions on which we invite you to give your point of view and discuss. These questions will cover the areas for improvement already mentioned during the first focus groups, and the resources needed to implement these improvements. I would also like to remind you that this focus group will be audio-recorded and that this recording will then be transcribed and anonymised for data analysis. The rules for this focus group are, therefore, to be respectful of everyone's points of view and to speak only one person at a time and clearly so that it is audible on the recording. The focus group will last between 1 and 1.5 hours.

Before starting the focus group, we invite you to introduce yourselves by giving your name, your profession, and how long you have been practising.

| Subject | Theme | Questions | Follow-up questions | Response |
| --- | --- | --- | --- | --- |
| Strengthening inter-professional collaboration | Roles | - During the first two focus groups, suggestions were made for improving interprofessional collaboration. These included a better definition of each person's roles and responsibilities to improve coordination between professionals and greater patient involvement. How can these roles and responsibilities (including those of patients) be better defined? | - Are these improvements easy to implement ? | - Pharm1 - Pharm3 - Med2 - Med3 - IPM - Inf - Pat2 |
| Comments : | | |
| Opinions on areas for improvement raised during the initial focus groups | Transmission of information | - The transmission of information concerning medication during the hospital-outpatient transition is an area in which there are several areas for improvement. Among them, the use of a shared medical record is a solution. What do you think? | - A lack of political decisions seems to be limiting the introduction of this record. What additional resources would be needed to implement the health record and the other solutions mentioned? - In your opinion, will these resources be put in place shortly, and why? - How can patients be involved ? | - Pharm1 - Pharm3 - Med2 - Med3 - IPM - Inf - Pat2 |
| Comments : | | |
| Applications | - During the focus groups, numerous applications and IT systems were mentioned for patients and healthcare professionals about medication. What do you think ? | - What types of applications/platforms should be prioritized? - How do you see the digitalization of healthcare supporting the transition from hospital to the outpatient department ? - How to prepare for these IT changes ? - What does the patient think? | - Pharm1 - Pharm3 - Med2 - Med3 - IPM - Inf - Pat2 |
| Comments : | | |
| Other areas for improvement | Ideas for further improvements | - Are there any other areas for improvement in interprofessional collaboration on medication that you feel have not been mentioned? | - What could be done at your level to improve the continuity of medication when patients are discharged from the hospital? | - Pharm1 - Pharm3 - Med2 - Med3 - IPM - Inf - Pat2 |
| Comments | | |

10 minutes before the end: Were there any themes you would have liked to discuss during this focus group?

Following this focus group, if we have any questions for clarification on certain points raised, can we contact you, and by what means (e-mail, telephone)?

# Figure S3: Focus group 4

**Introductory text to the focus group:**

I'd like to thank you all for coming to this 4th focus group and I'm delighted to finally meet you all. A few words about this focus group. As a reminder, this mixed focus group brings together healthcare professionals working in outpatient and inpatient settings who are in contact with polypharmacy patients discharged from the hospital and returning home*.* We also have a patient partner with us today.

First of all, I'd like to thank you for completing the questionnaire on the classification of areas for improvement. Thank you. We were able to collect some interesting data. As many of the areas for improvement were discussed during the previous focus groups, we were able to select some of them today so that we could discuss them together to guide the discussion. You talked a lot about the electronic patient file and roles and responsibilities, and we will focus on other areas for improvement. If we have time in the end, we'll come back to it.

I would also remind you that this focus group is being audio recorded and that this recording will then be transcribed and anonymised for data analysis. The rules for this focus group are therefore to be respectful of each person's point of view and to speak only to one person at a time so that it is audible on the recording. The focus group will last between 1 and 1.5 hours.

I'd like us to bear in mind that we're talking about patients who are hospitalised with several medications and who return home without any help from home care.

To begin with, could you tell us about your profession and place of work for those who were not present at the last focus groups?

| Themes | Questions | Follow-up questions | Answer |
| --- | --- | --- | --- |
| Transmission of information | **Improved transmission of discharge documents (short turnaround times, all recipients always notified)** was classified as an impacting improvement. In your opinion, what impact can it have on interprofessional collaboration? | What are the key points for improving the transmission of discharged documents?  Who should the recipients be?  This improvement was rated as moderately easy to implement:   - What would facilitate its implementation? - What would be the barriers to its implementation? | - Pharm1 - Pharm3 - Med2 - Med4 - IPM - Inf - Pat1 |
|  | comments |  |  |
| Care coordination | **Upstream coordination of discharge with the outpatient setting (e.g. sending the prescription upstream, and informing the GP of the discharge upstream)** was classified as an impacting improvement. In your opinion, what impact does this have on continuity of care on discharge from the hospital? | What role would each healthcare professional play in this coordination?  This improvement was rated as fairly easy to implement:   - What would facilitate its implementation? - What would be the barriers to its implementation? | - Pharm1 - Pharm3 - Med2 - Med4 - IPM - Inf - Pat1 |
|  | comments |  |  |
| Patient involvement | **Reinforcing therapeutic patient education was** ranked as an easy improvement to implement. How do you see it being implemented? | One participant mentioned that patient participation in therapeutic education depended on the bio-psycho-social context. How might this affect continuity of care for different patients?  One participant mentioned the involvement of a patient partner. What do you think?  This improvement was rated as relatively easy to implement: why? | - Pharm1 - Pharm3 - Med2 - Med4 - IPM - Inf - Pat1 |
|  | Comments |  |  |
| Services | **The introduction of medication monitoring services on discharge from the hospital (e.g. calls or text messages to patients on discharge from the hospital; interview in the pharmacy)** was rated as an improvement with little impact and difficult to implement. What do you think? | What are the main barriers? | - Pharm1 - Pharm3 - Med2 - Med4 - IPM - Inf - Pat1 |
|  | comments |  |  |
| Role and responsibility | **Defining the roles and competencies of the various healthcare professionals (e.g. through training and inter-professional meetings)** was ranked as an improvement that would be easy to implement. How do you see it being implemented? | How can we define roles and competencies?  How can communication of these roles and responsibilities be improved?  This improvement was classified as having little impact: why? | - Pharm1 - Pharm3 - Med2 - Med4 - IPM - Inf - Pat1 |
| Other | Year of experience |  |  |

10 minutes before the end: Were there any themes you would have liked to discuss during this focus group?

Following this focus group, if we have any questions for clarification on certain points raised, can we contact you, and by what means (e-mail, telephone)?
